# Supplementary material for: Identification of novel genotypes belonging to the species Teschovirus A from indigenous pigs in western Jiangxi, China
Source: Springer Nature journal article supplement (doi:10.1007/s00705-020-04525-6), 2020-02-10
Supplement: MOESM1 [file 17666266]

Supplementary Table 1 Detailed information of PTV-positive samples in this study

| PTV-positive sample | Age group | Strain_genotype_GenBank acc. no._sequence length |
| --- | --- | --- |
| SGNq1 | Nursery pigs | Strain is identical with SG6a |
| SGNq2 | Nursery pigs | Strains are identical with SG6 and SG9, respectivelya |
| SGNq3 | Nursery pigs | Strains are identical with SG6 and SG9, respectivelya |
| SGNq4 | Nursery pigs | SG7_undefined_MN162705_complete *VP1* gene /SG9_17_MN162707_full-lenth genome /another strain is identical with SG5a |
| SGNq5 | Nursery pigs | Strains are identical with SG6 and SG10, respectivelya |
| SGNq6 | Nursery pigs | Strain is identical with SG6a |
| SGNq7 | Nursery pigs | Strain is identical with SG6a |
| SGNq9 | Nursery pigs | SG6_10_MN162704_complete *VP1* gene /SG10_18_MN162708_full-lenth genome |
| SGNq10 | Nursery pigs | Strain is identical with SG10a |
| SGNp1 | Nursery pigs | SG2_undefined _MN162700_complete *VP1* gene |
| SGNp2 | Nursery pigs | Strains are identical with SG3 and SG5, respectivelya |
| SGNp3 | Nursery pigs | — |
| SGNp4 | Nursery pigs | SG3_4_MN162701_complete *VP1* gene /SG4_5_MN162702_complete *VP1* gene /SG5_9_MN162703_complete *VP1* gene |
| SGNp5 | Nursery pigs | Strain is identical with SG9a |
| SGNp6 | Nursery pigs | — |
| SGNp7 | Nursery pigs | — |
| SGNp9 | Nursery pigs | — |
| SGNp10 | Nursery pigs | — |
| SGSq1 | Suckling pigs | — |
| SGSq3 | Suckling pigs | — |
| SGSq5 | Suckling pigs | — |
| SGSq6 | Suckling pigs | — |
| SGSq7 | Suckling pigs | — |
| SGSp2 | Suckling pigs | — |
| SGSp4 | Suckling pigs | — |
| SGSp6 | Suckling pigs | — |
| SGSp10 | Suckling pigs | SG8_1_MN162706_complete *VP1* gene |
| SGFq5 | Fattening pigs | Strain is identical with SG1a |
| SGFq6 | Fattening pigs | — |
| SGFq7 | Fattening pigs | — |
| SGFq8 | Fattening pigs | — |
| SGFq9 | Fattening pigs | — |
| SGFq10 | Fattening pigs | — |
| SGFp1 | Fattening pigs | Strain is identical with SG8a |
| SGFp2 | Fattening pigs | — |
| SGFp3 | Fattening pigs | — |
| SGFp5 | Fattening pigs | SG1_2_MN162699_complete *VP1* gene |
| SGFp6 | Fattening pigs | — |
| SGFp7 | Fattening pigs | Strain is identical with SG8a |
| SGFp8 | Fattening pigs | Strain is identical with SG8a |
| SGFp10 | Fattening pigs | Strain is identical with SG8a |
| SGHB4 | Gilt | — |
| SGHB5 | Gilt | — |
| SGHB6 | Gilt | Strain is identical with SG1a |
| SGHB7 | Gilt | — |
| SGM1 | Sow | — |
| SGM3 | Sow | — |
| SGM7 | Sow | Strain is identical with SG8a |
| SGM9 | Sow | — |
| SGM10 | Sow | — |

—, not identified.

a The complete *VP1* gene sequence identity.
